# Supplementary material
Source: publisher site journal article supplement (https://www.dovepress.com/article/465369)
Supplement: Supplementary file 1 [file get_supplementary_file.php]

Supplementary Table 1. Ethics Committees and Institutional Review Boards Providing Approval for this Study

| **Country** | **Name of Institution** | **Address** |
| --- | --- | --- |
| ‍**South Korea** | IRB of Severence Hospital, YUHS | 50-1 Yonsei-ro, Seodaemun-gu  Seoul 3722 |
| ‍ | IRB of Seoul St. Mary’s Hospital | 222 Banpo-daero, Seocho-gu  Seoul 6502 |
| ‍ | IRB of Seoul National University Hospital | 101, Daehak-ro, Jonno-gu  Seou 3080 |
| ‍ | IRB of Asan Medical Center | 88, Olympic-ro 43-gil, Songpa-gu  Seoul 5505 |
| ‍ | IRB of Samsung Medical Center | 81 Irwon-ro, Gangnam-gu  Seoul 6351 |
| ‍ | IRB of Kangbuk Samsung Medical Center | 29 Saemunan-ro, Jongno-gu  Seoul 3181 |
| ‍ | IRB of Pusan National University Hospital | 179, Gudeok-ro, Sel-gu  Busan 602-739 |
| ‍ | IRB of Kim’s Eye Hospital | 136 Yeongshin-ro, Yeongdeungpo-gu  Seoul 11 |
| ‍ | IRB of Chungnam National University Hospital | 282 Munhwa-ro, Jung-gu  Daejon 35015 |
| ‍**Taiwan** | IRB of Tri-Service General Hospital, National Defe | No. 325, Section 2, Cheng-Kung Road, Neihu  Taipei 11490 |
| ‍ | Taipei Veterans General Hospital IRB | 201 Shih-Pai Road, Section 2  Taipei 11217 |
| ‍ | Changhua Christian Hospital IRB | 135 Nan-Hsiao Street  Changhua 500 |
| ‍ | RERC, Far Eastern Memorial Hospital | No. 21, Section 2, Nanya South Road, Banciao District  New Taipei City 220 |
| ‍ | Kaohsiung Medical University Chung-Ho Memorial Hospital | No. 100, Tzyou 1st Road  Kaohsiung 807 |
| ‍ | REC China Medical University & Hospital | 2, Yude Road  Taichung 40447 |
| ‍ | Kaohsiung Veterans General Hospital IRB | 386 Ta-Chung 1st Road  Kaohsiung 81362 |
| ‍ | Cathay General Hospital IRB | No. 280, Sec. 4, Ren Ai Road  Taipei 10630 |
| ‍ | National Taiwan University Hospital REC | 7, Chung-Shan South Road  Taipei 100 |
| **‍Singapore** | Singhealth Centralized IRB | 169 Jalan Bukit Merah  #06-08 Tower 3, Connection One  Singapore 150168 |
| ‍ | Parkway Independent EC | Haw Par Centre,  180 Clemenceau Avenue, #06-01  Singapore 239922 |
| **‍India** | PSG Institute of Medical Science & Research IHEC | No. 1674, Peelamedu  Coimbatore, Tamil Nadu 641004 |
| ‍ | Bhagwan Mahaveer Jain Hospital IEC | Millers Road, Vasanth Nagar  Bengaluru, Karnatka 560052 |
| ‍ | L V Prasad Eye Institute EC | Kallam Anji Reddy Campus, Banjara Hills  Hyderabad, Telangana 500034 |
| ‍ | EC B B Eye Foundation | Sukhsagar, 2/5 Sarat Bose Road  Kolkata, West Bengal 700020 |
|  | Dr Shroffs Eye Hospital EC | 5027, Kedar nath Road  Daryaganj, New Delhi 110002 |
| ‍ | IEC of KGMU | Office of Research Cell, Chowk  Lucknow, Uttar Pradesh 226003 |
| ‍ | B J Medical College and Civil Hospital IEC | M & J Western Regional Institute of Ophthalmology  A2, Room, No 21 Civil Hospital Campus  Ahmedabad, Gujarat 380016 |
| ‍ | Aster Aadhar EC | Aster Aadhar Hospital (Prerana Hospital Ltd.)  R S No 628 B Ward, Near Shastri Nagar  KMT Hospital  Kolhapur, Maharashtra 416012 |
| ‍ | S. R. Kalla Memoral EC for Human Research | 78-79, Dhuleshwar Garden, Sardar Patel Marg, C-Scheme  Jaipur, Rajastan 302001 |
| ‍ | Regional Institute of Ophthalmology Human EC | Red Cross Road, Vanchiyoor P.O.  Thiruvananthapuram, Kerala 695035 |
| ‍ | IRB, Vision Research Foundation | Sankara Nethralaya (a unit of Medical Research Foundation)  New No. 41/Old 18, College Road, Nungambakkam  Chennai, Tamil Nadu 600006 |
| ‍ | IEC, Mysore Medical College & Research Institute | K.R. Hospital, Irwin Road  Mysuru, Karnataka 570021 |
| ‍ | IRB, Dr. Agarwal’s Eye Hospital | No. 10, South Bypass Road  Vannarpetti, Tirunelveli  Tamil Nadu 627003 |
|  |  |  |

Abbreviations: EC, ethics committee; IEC, institutional ethics committee; IRB, institutional review board
